# Supplementary material
Source: Research Square preprint supplement (doi:10.21203/rs.3.rs-9459092/v1)
Supplement: Supplementary file 1 [file a8e13630e1ee3173aec1d21b.pdf]

1 **Supplemental Figure 1.**

2 (A) Immunofluorescence staining showing SOX9 (green), and DAPI (blue) expression in  
3 airway stem cells. Scale bars represent 100  $\mu\text{m}$ .

4 (B) Representative images of pig airway stem cells transduced with Venus-Akaluc, shown by  
5 phase contrast microscopy (left) and fluorescence microscopy (right). Scale bars  
6 represent 100  $\mu\text{m}$ .

7 (C) Representative images of pig airway stem cell-derived organoids transduced with Venus-  
8 Akaluc, shown by bright-field microscopy (left) and fluorescence microscopy (right).  
9 Scale bars represent 100  $\mu\text{m}$ .

10

11 **Supplemental Figure 2.**

12 (A) Quantitative comparison of Akaluc signal intensity between PA injection and bronchial  
13 injection (n=3). There was a significant difference between the two groups ( $p < 0.01$ , two-  
14 way ANOVA).

15 (B) Representative histological images of transplanted organoids following PA injection,  
16 shown by hematoxylin and eosin (H&E) staining and GFP immunohistochemistry. Some  
17 cells were observed migrating beyond the vascular boundary ( $\rightarrow$  indicates migrating  
18 cells). Scale bars represent 50  $\mu\text{m}$ .

19

20 **Supplementary Figure 3.**

21 (A) CT scan image of the pig lung on day -7, day 0, and day 7.

22 (B) Bioluminescence detection of Akaluc signals in the pig lung on day 7 using the Xenogen  
23 IVIS Spectrum system.

24 (C) Time-course of blood cyclosporin A levels during the transplantation period.

25

26

27

28

29

30

31

32

33

34

35

36

37

38

39

40

41

42

43

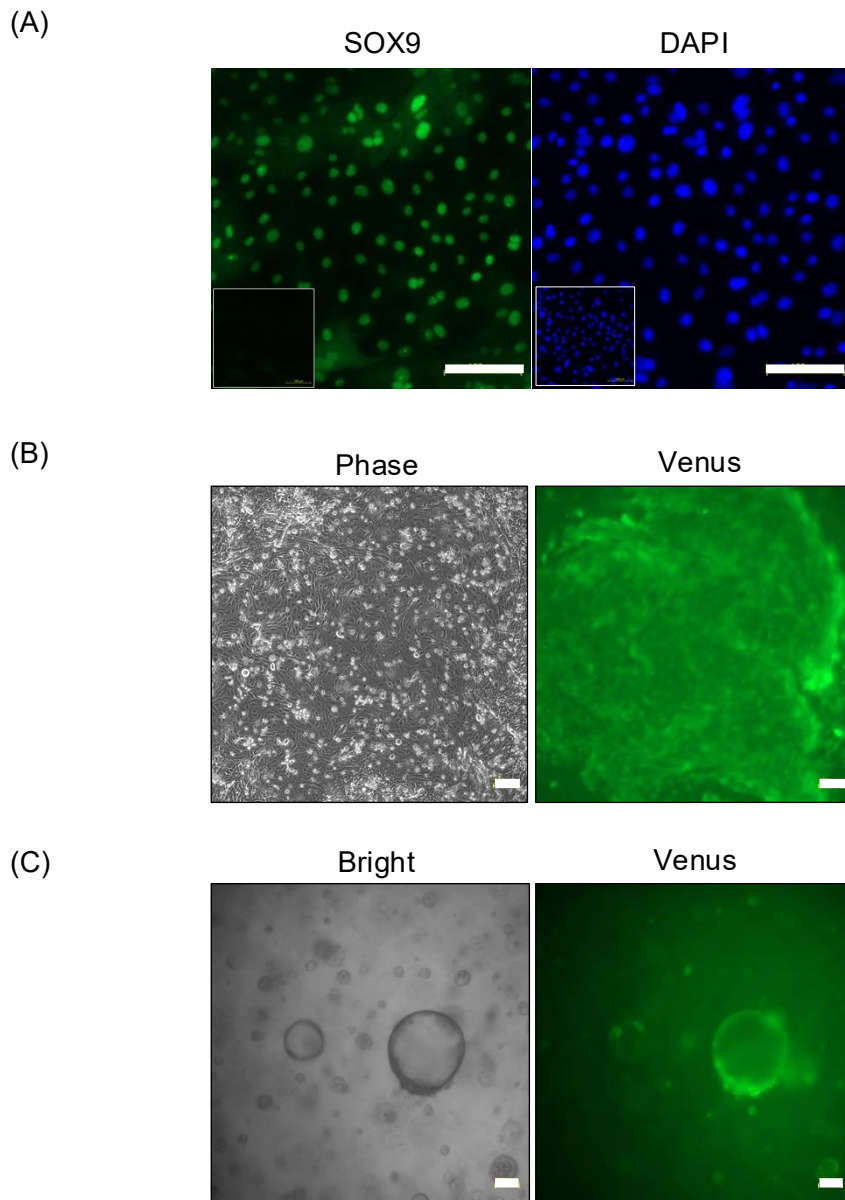

**Supplementary Figure 1.**

- (A) Immunofluorescence staining showing SOX9 (green), and DAPI (blue) expression in airway stem cells. Scale bars represent 100  $\mu$ m.
- (B) Representative images of pig airway stem cells transduced with Venus-Akaluc, shown by phase contrast microscopy (left) and fluorescence microscopy (right). Scale bars represent 100  $\mu$ m.
- (C) Representative images of pig airway stem cell-derived organoids transduced with Venus-Akaluc, shown by bright-field microscopy (left) and fluorescence microscopy (right). Scale bars represent 100  $\mu$ m.

(A)

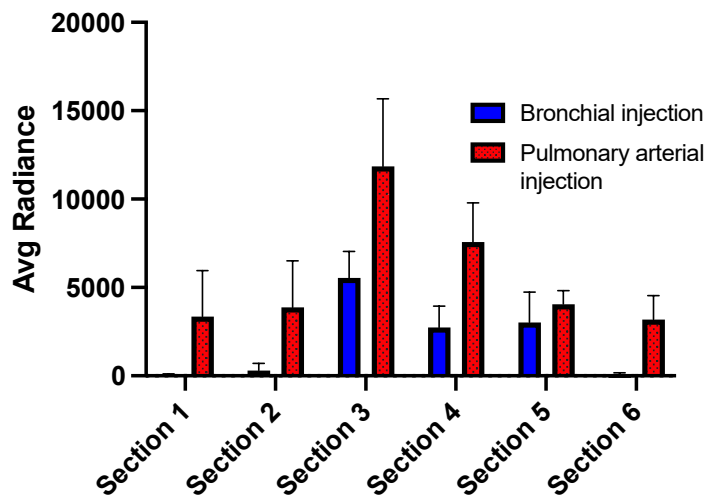

(B)

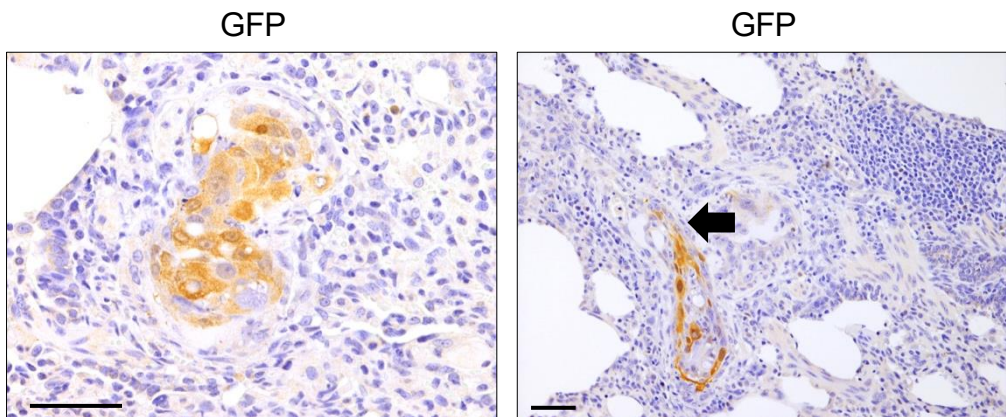

### Supplementary Figure 2.

- (A) Quantitative comparison of Akaluc signal intensity between PA injection and bronchial injection. There was a significant difference between the two groups ( $p < 0.01$ , two-way ANOVA).
- (B) Representative histological images of transplanted organoids following PA injection, shown by hematoxylin and eosin (H&E) staining and GFP immunohistochemistry. Some cells were observed migrating beyond the vascular boundary (➔ indicates migrating cells). Scale bars represent 50  $\mu\text{m}$ .

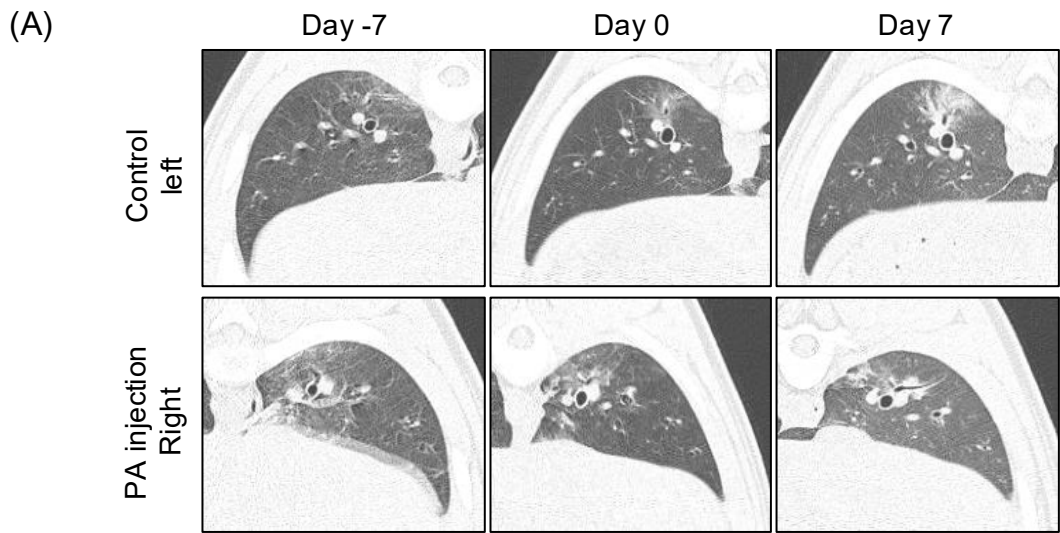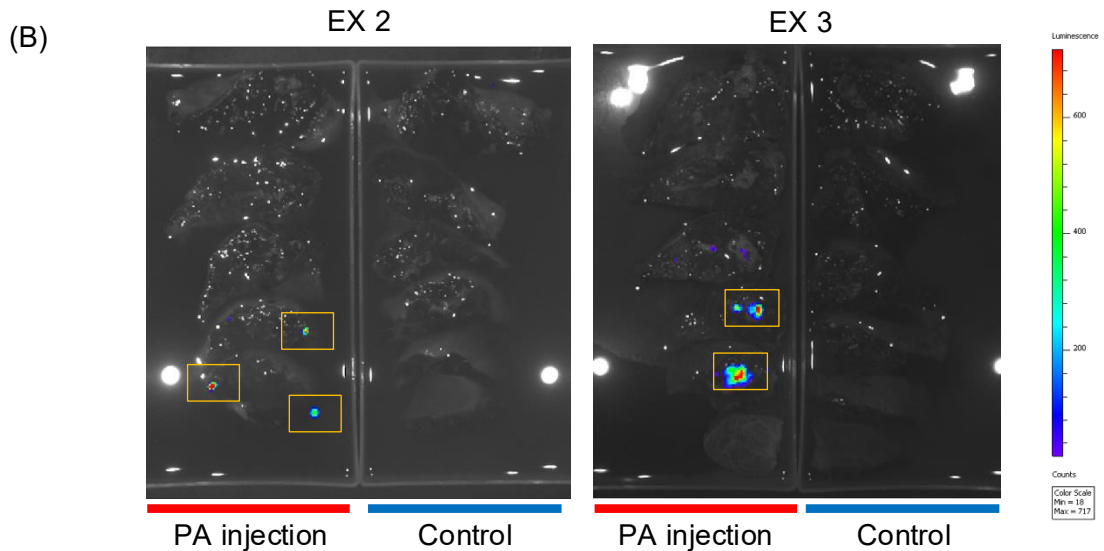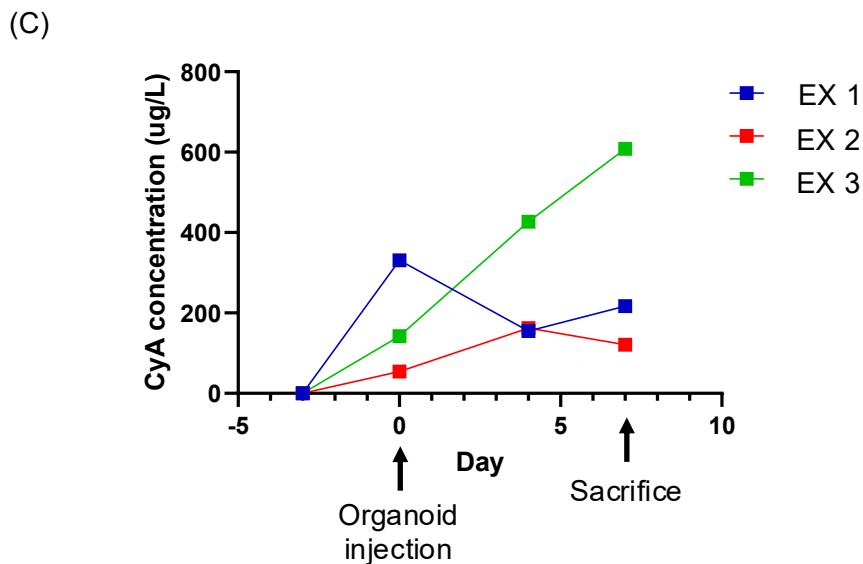

**Supplementary Figure 3.**

(A) CT scan image of the pig lung.

(B) Bioluminescence detection of Akaluc signals in the pig lung on day 7 using the Xenogen IVIS Spectrum system.

(C) Time-course of blood cyclosporin A levels during the transplantation period.
